# Supplementary material
Source: HighWire-hosted journal article supplement (https://www.cmaj.ca/content/suppl/2008/04/21/178.9.1177)
Supplement: health-dummer-f.pdf [file health-dummer-f.pdf]

## Santé publique

# La géographie de la santé à l'appui des politiques et de la planification en santé publique

Trevor J. B. Dummer PhD

**G**éographie et santé sont indissociables. L'endroit où nous naissons, vivons, étudions et travaillons influe directement sur nos expériences en matière de santé, sur l'air que nous respirons, les aliments que nous consommons, les virus auxquels nous sommes exposés et les services de santé auxquels nous avons accès. Notre environnement social, bâti et naturel affecte notre santé et notre bien-être de diverses façons qui concernent directement les politiques sanitaires. La localisation dans l'espace (contexte géographique et relations entre les divers lieux) joue un rôle de tout premier plan dans la mise en place des risques environnementaux et dans de nombreux autres déterminants de la santé<sup>1</sup>. Par exemple, le choix de l'emplacement d'un établissement de soins de santé, le ciblage des stratégies de santé publique ou la surveillance des éclosions de maladie ont tous une incidence géographique.

## Qu'est-ce que la géographie de la santé?

La géographie de la santé est une discipline dérivée de la géographie humaine qui étudie les rapports entre les gens et leur environnement. La géographie de la santé perçoit la santé dans une perspective holistique qui englobe la société et l'espace et conceptualise les rôles du lieu, de sa localisation et de sa géographie dans la santé, le bien-être et la maladie<sup>2,3</sup>. Bien que la géographie de la santé soit étroitement associée à l'épidémiologie, sa principale caractéristique distinctive est l'étude des relations et modèles spatiaux. Tandis que l'épidémiologie se fonde sur un modèle biomédical et se consacre à la dimension biologique de la maladie, la géographie de la santé cherche à explorer les contextes sociaux, culturels et politiques qui influent sur la santé dans le cadre d'une organisation spatiale. Habituellement, la recherche en géographie de la santé porte sur deux domaines distincts soit les modèles, les causes et la propagation de la maladie et la planification et la prestation des services de santé. La recherche dans ces domaines interreliés sert de support à l'élaboration des politiques en matière de santé. Par exemple, l'épidémiologie d'une maladie est en partie liée à la localisation des services de santé offerts<sup>4</sup>.

## Pourquoi la géographie est-elle importante dans l'élaboration de politiques de santé publique?

Des prises de décisions éclairées permettent la mise en œuvre de politiques de santé publique efficaces et fondées sur des preuves. Il nous faut comprendre les facteurs de risque à l'égard des maladies et la façon dont ces facteurs, notamment la composante génétique de la maladie, le mode de vie, l'environnement

et le type d'emploi interagissent avec l'environnement social, bâti et naturel<sup>5</sup>. Pour évaluer les interactions inhérentes à de nombreux types d'exposition à des risques pour la santé, il est indispensable de comprendre la géographie, y compris l'aménagement des services de santé et la localisation et la nature des diverses sources de contamination environnementales.

De nombreux thèmes centraux en recherche géographique, y compris les inégalités, la polarisation en matière de santé et les questions d'échelle, de globalisation et d'urbanisation<sup>6</sup>, ont un lien direct avec la santé publique. La portée et l'ampleur de la recherche en géographie de la santé sont considérables et multidimensionnelles; le Tableau 1 propose des exemples de domaines de recherche courants, qui ont une incidence sur les politiques de santé publique. Ces domaines de recherche ne s'excluent pas mutuellement et certains sont même propices au recoupement de plusieurs domaines et thèmes. Dans les paragraphes qui suivent, nous présentons ces thèmes de recherche plus en détail afin de mieux expliquer le rôle de la géographie de la santé dans la santé publique.

## Échelle spatiale, globalisation et urbanisation

La question des échelles d'organisation est cruciale pour la prestation des services de santé et la mise en œuvre de mesures de santé publique. Par exemple, certains problèmes mondiaux, comme les changements climatiques, les migrations de populations et l'internationalisation de l'organisation des services de santé, se situent tous dans des contextes géographiques qui influent directement sur les politiques en matière de santé<sup>6</sup>. Les modèles mondiaux de propagation des maladies infectieuses, y compris du VIH/sida, de la grippe aviaire et du syndrome respiratoire aigu sévère (ou SRAS), subissent tous l'influence des migrations, des mouvements de populations et de la diffusion des maladies. Ces processus dépendent en retour de certains facteurs régionaux ou locaux, comme les conditions socio-économiques et le marché de l'emploi.

La croissance des villes et la nature changeante de l'environnement bâti a exercé et continue d'exercer un impact important sur la santé et le bien-être. Par exemple, l'actuelle épidémie mondiale d'obésité découle de facteurs qui ont un rôle à jouer dans le réchauffement planétaire (p. ex., le changement des modes de transport qui contribue à l'émission des gaz à effets de serre) et de facteurs qui influent sur la structure des environnements bâtis locaux et sur les tendances socioculturelles liées à l'activité physique, à l'offre et à la consommation alimentaires. Dans un tel contexte, un problème touchant les politiques de santé devrait

---

Le Dr Dummer est attaché au Centre de santé IWK et au Centre canadien de vaccinologie d'Halifax, Nouvelle-Écosse.

faire la lumière sur les facteurs de nature géographique susceptibles de guider les décideurs en matière de planification locale, de transports, de politiques alimentaires et de commercialisation des aliments. La Figure 1 donne un exemple qui explique de quelle façon l'environnement bâti peut influencer sur les choix alimentaires des enfants et l'obésité des populations.

## Inégalités sociales et géographiques en matière de santé

Les inquiétudes soulevées par la polarisation des problèmes sociaux et géographiques, surtout en ce qui a trait aux inégalités socio-économiques, aux injustices et à la pauvreté, ont poussé les chercheurs à se pencher sur les tenants et aboutissants des variations qui affectent la santé, y compris les problèmes de pauvreté, d'accessibilité aux soins de santé et de santé publique. La reconnaissance des inégalités qui persistent du point de vue de la santé entre personnes riches et personnes pauvres et entre collectivités nanties et collectivités indigentes a servi de base à l'élaboration de politiques visant à corriger les causes sous-jacentes de certains problèmes de santé<sup>17,18,21</sup>. En ce qui a trait aux processus mondiaux, nationaux et régionaux, les facteurs locaux qui influent sur la géographie et la vie de tous les jours des individus sont des facteurs incontournables qui évoluent constamment et dont il faut tenir compte lors de l'élaboration de politiques en matière de santé.

## Approches en recherche géographique

La recherche en géographie de la santé est souvent tiraillée entre des considérations méthodologiques quantitatives et qualita-

tives, les études quantitatives étant plus étroitement liées à l'épidémiologie et les études qualitatives, à la sociologie médicale et aux sciences sociales. Bien qu'il faille des approches diversifiées pour analyser certains problèmes complexes, ces méthodologies partagent un élément commun : l'étude du rôle de la géographie et de l'espace dans la santé. Par exemple, une étude quantitative sur une éclosion de maladie infectieuse, comme les oreillons, pourrait s'attarder à la modélisation spatiale de la diffusion de la maladie, tandis qu'une enquête qualitative s'attarderait aux facteurs socioculturels de l'adhésion aux programmes de vaccination dans les collectivités et ses caractéristiques seraient prédéfinies conformément à des critères d'épidémiologie et de géographie de la santé. Souvent, les géographes de la santé allient méthodes quantitatives et qualitatives dans des approches mixtes et complémentaires. Les géographes contribuent à la mise au point de méthodologies susceptibles d'aider la recherche médicale, notamment les modèles statistiques multiniveaux, les analyses en grappes et les analyses de régression pondérées selon des critères géographiques<sup>22</sup>.

Les systèmes d'information géographique complètent ou ne peut mieux les outils du géographe. Un système d'information géographique est un système informatisé de collecte, de sauvegarde, de représentation et de manipulation des données spatiales et ce type de système est de plus en plus utilisé pour explorer et analyser l'information liée à la santé à des fins de recherche sur des paramètres ayant trait à la santé et à la prestation des soins de santé<sup>23</sup>. Les systèmes d'information géographique viennent en aide à la santé publique de diverses façons, notamment par le biais de la cartographie, de la surveillance et de la modélisation des maladies infectieuses et chroniques, de la surveillance épidémiologique et de la détection des éclosions, de la préparation aux crises et du ciblage des

**Tableau 1 :** Exemples de recherches en géographie de la santé ayant eu une incidence sur des politiques en matière de santé publique

| Domaine de recherche                                                      | Exemples                                                                                                                                                                                                                                                                                                                                                                  |
|---------------------------------------------------------------------------|---------------------------------------------------------------------------------------------------------------------------------------------------------------------------------------------------------------------------------------------------------------------------------------------------------------------------------------------------------------------------|
| Services, infrastructures et planification de l'utilisation du territoire | <ul style="list-style-type: none"> <li>• Accessibilité géographique à des aliments sains<sup>7</sup></li> <li>• Planification de l'utilisation du territoire et influence sur la variation sociodémographique de l'activité physique<sup>8</sup></li> </ul>                                                                                                               |
| Épidémiologie, modélisation et cartographie                               | <ul style="list-style-type: none"> <li>• Lutte contre les maladies infectieuses, y compris cartographie des éclosions de paludisme, élimination de la lèpre et épidémiologie de la maladie de Lyme<sup>9</sup></li> <li>• Analyse des grappes géographiques de décès par cancer du sein<sup>10</sup></li> </ul>                                                           |
| Étiologie d'une maladie et facteurs influant sur la santé                 | <ul style="list-style-type: none"> <li>• Variation géographique de la maladie inflammatoire de l'intestin et reconnaissance des facteurs de risque environnementaux potentiels<sup>11</sup></li> <li>• Influences locales et modifiables sur l'alimentation, l'activité physique et l'obésité<sup>12</sup></li> </ul>                                                     |
| Évaluation des facteurs de risque environnementaux pour la santé          | <ul style="list-style-type: none"> <li>• Issues négatives de la grossesse chez des femmes vivant à proximité d'incinérateurs et autres sources de pollution environnementale<sup>13</sup></li> <li>• Lien entre pollution atmosphérique et mortalité<sup>14</sup></li> </ul>                                                                                              |
| Utilisation des services de santé                                         | <ul style="list-style-type: none"> <li>• Accessibilité aux hôpitaux et aux médecins de famille et utilisation des services hospitaliers en cours d'hospitalisation<sup>15</sup></li> <li>• Réorganisation régionale des services de chirurgie cardiovasculaire<sup>16</sup></li> </ul>                                                                                    |
| Inégalités sur le plan des paramètres de la santé                         | <ul style="list-style-type: none"> <li>• Variations rurales-urbaines et intrarurales de la santé au Québec<sup>17</sup></li> <li>• Polarisation sociale et spatiale des paramètres de la santé au cours de la vie<sup>18</sup></li> </ul>                                                                                                                                 |
| Environnements naturels thérapeutiques et sains                           | <ul style="list-style-type: none"> <li>• Influence des boisés et des espaces verts sur la santé mentale des adolescents<sup>19</sup></li> <li>• Rôle de l'image des villes, de la perception des risques, de la stigmatisation environnementale et de l'inégalité entre les quartiers dans la définition du caractère sain ou malsain des milieux<sup>20</sup></li> </ul> |

interventions et initiatives de promotion de la santé. La recherche novatrice récente, qui repose sur les systèmes d'information géographique, peut éclairer d'un jour nouveau l'impact de l'environnement bâti sur le degré d'activité physique, l'alimentation et le problème croissant d'obésité<sup>24</sup>.

Bien que les géographes de la santé utilisent souvent des approches épidémiologiques classiques, par exemple, pour la modélisation comme pour l'analyse statistique des études, la discipline s'est également dotée d'outils analytiques distincts, dont des méthodes appliquées aux systèmes d'information géographique pour l'intégration, la cartographie et l'analyse des données, et des techniques statistiques d'analyse spatiale, comme des méthodes d'analyses en grappes et d'interpolation spatiale.

## Santé et milieu : Mise en garde et reconnaissance

Lorsqu'on utilise des méthodes géographiques, il est important d'en connaître les risques potentiels. Les politiques inspirées de la recherche géographique peuvent être négativement affectées par des assertions écologiques fallacieuses qui donnent lieu à des hypothèses erronées au sujet des gens, sur la base de données regroupées relatives à leur collectivité<sup>22</sup>. Cela peut entraîner un ciblage à mauvais escient de politiques établies en fonction de groupes ou de lieux spécifiques. Le problème des unités spatiales modifiables, source potentielle d'erreurs, se manifeste

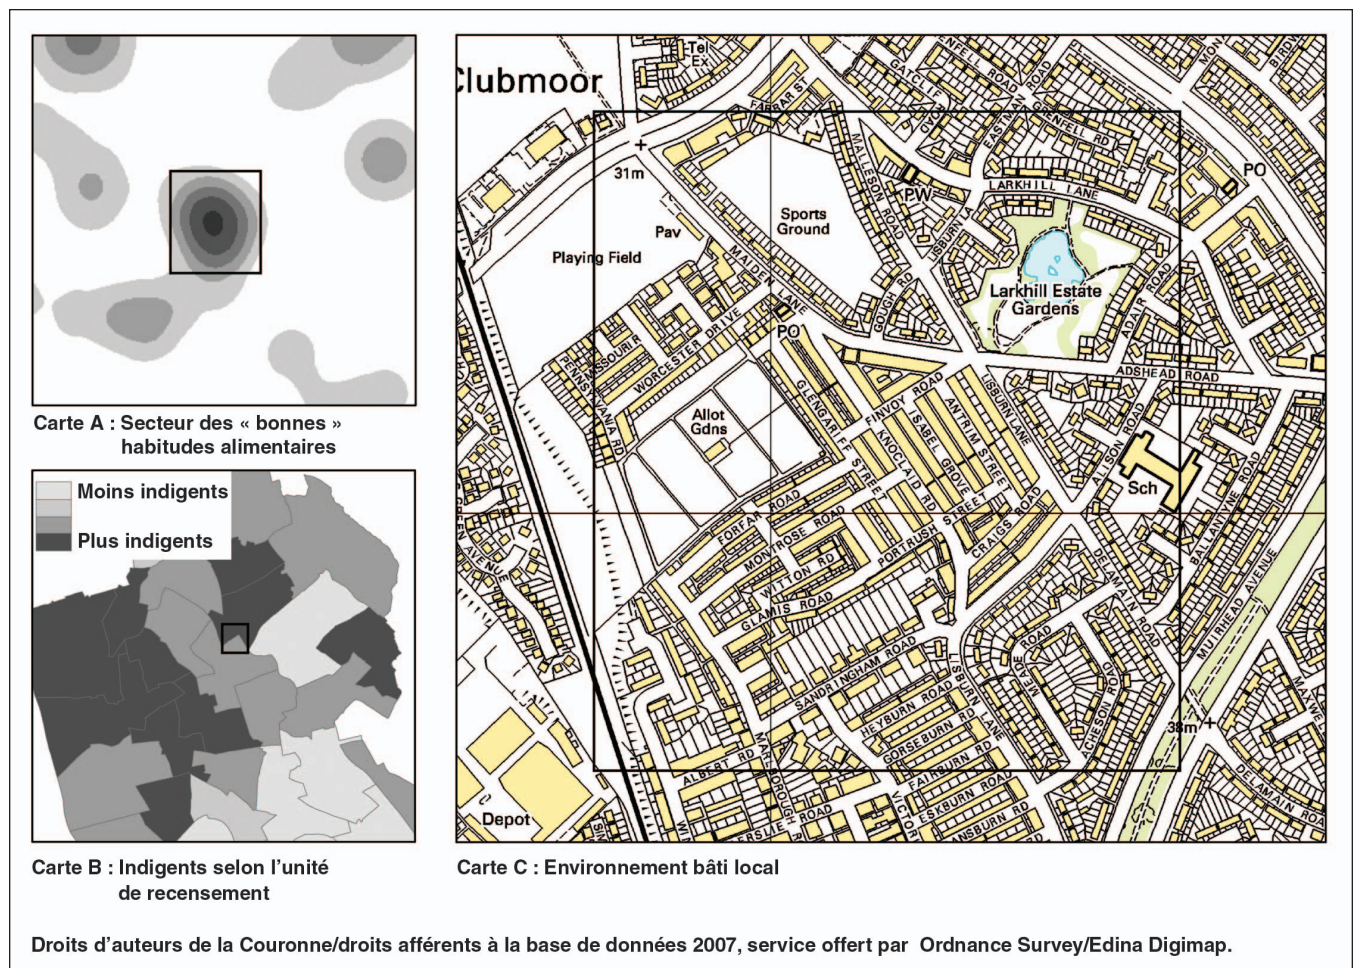

**Figure 1 :** Analyse spatiale exploratoire des habitudes alimentaires chez des enfants de Liverpool, Royaume-Uni. Cartographie des données relatives aux choix alimentaires d'enfants de Liverpool afin de cerner les secteurs où les habitudes alimentaires sont bonnes (zones d'ombre plus foncées de la carte A). On note une zone restreinte où les habitudes alimentaires sont bonnes (zone encadrée de la carte A) dans une collectivité où se recourent 2 unités de recensement (carte B). L'une de ces unités présente un taux très élevé d'indigence socio-économique et de pauvreté (carte B). Toutefois, la carte C montre que, malgré des taux élevés d'indigence, l'environnement bâti local comporte beaucoup d'espaces ouverts, des parcs, des installations récréatives et des jardins communautaires où l'on peut cultiver des fruits et des légumes et ces facteurs sont potentiellement associés à de meilleurs choix alimentaires chez les enfants. Le recours à une approche géographique analytique, à la cartographie et à l'intégration de différentes séries de données éclairent d'un jour nouveau l'analyse des données. Bien qu'il s'agisse d'une méthode exploratoire, elle ouvre la porte à des hypothèses, comme l'influence potentielle du rôle de l'environnement bâti sur les choix alimentaires, vérifiables ici de manière analytique et susceptibles de guider l'élaboration de politiques pouvant contribuer à la lutte contre l'obésité. Utilisé avec l'autorisation d'EDINA/Ordnance Survey. ©Droits d'auteur de la Couronne/droits afférents à la base de données 2007. Service offert par Ordnance Survey/EDINA.

lorsqu'un modèle géographique identifié résulte en partie de la taille et de la configuration des unités spatiales utilisées dans l'étude<sup>22</sup>. Bien que les cartes soient d'importants outils visualiser l'information relative à la santé et pour appuyer les décisions en matière de politiques sanitaires, le choix des unités spatiales et l'agrégation et la catégorisation des données doivent entrer en ligne de compte lors de l'interprétation des résultats.

Outre ces restrictions, le lieu et le contexte géographique sont reconnus comme d'importants facteurs qui influent sur la santé<sup>25,26</sup>. Bien que la fausseté de certains arguments écologiques ait été invoquée pour rejeter certaines études à tendance écologique (regroupées) sous prétexte qu'elles seraient plus ou moins fiables, approximatives et uniquement utiles à révéler, au mieux, des tendances, on reconnaît aujourd'hui que de nombreux facteurs de risque entrent en jeu à l'échelle des populations ou des collectivités<sup>25</sup>. Ces facteurs peuvent modifier certains impacts, comme l'interaction entre la composante génétique et la présence de contaminants chimiques, ou influencer directement sur la santé. Le rejet des études à saveur écologique relègue au second rang le contexte géographique dans lequel les paramètres de la santé sont observés<sup>25</sup>. Les progrès réalisés en terme de modélisation multiniveaux, de système d'information géographique et d'analyse spatiale viennent appuyer davantage la recherche sur l'influence relative des risques pour la santé à l'échelle des individus et des collectivités à l'intérieur d'un cadre unifié.

Parmi les développements récents en matière de géographie de la santé, mentionnons un intérêt croissant pour les inégalités en matière de santé et l'impact de la marginalisation spatiale et sociale sur la santé et une exploration plus pointue de la nature des changements qui affectent la santé<sup>6</sup>. Ce dernier point rappelle que les relations spatiales sont dynamiques et que les variations de la santé peuvent découler de la mobilité des individus et des mouvements et migrations de populations. Les systèmes d'information géographique, qui appuient l'analyse des données spatiales dynamiques<sup>27</sup>, correspondent davantage au système de positionnement global pour surveiller les mouvements de population en temps réel afin de contextualiser les interrelations entre les environnements physiques et bâtis, les routines journalières des gens et leur état de santé. Toutefois, l'optimisation de ces systèmes est freinée par des obstacles de 2 ordres, soit techniques (p. ex., mise au point de logiciels et de matériel informatiques appropriés pour saisir et analyser les données) et déontologiques (p. ex., accès aux données utiles et protection de la vie privée et des renseignements personnels)<sup>27</sup>.

## Conclusion

La géographie de la santé reconnaît l'importance du contexte, du milieu et de l'échelle spatiale, qui va de la dimension locale à la dimension mondiale, au moment de mesurer les paramètres liés à la santé. Les dangers qui guettent la santé et les soins de santé sont complexes et une approche intégrée et pluridisciplinaire s'impose pour que la recherche mette au jour des preuves pertinentes et de grande qualité afin de guider les politiques en matière de santé. La collaboration entre spécialistes de la santé, géographes et autres intervenants est propice à la découverte d'approches novatrices pour résoudre les problèmes complexes et amoindrir un jour les inégalités.

Cet article a été révisé par des pairs.

**Conflit d'intérêts** : Aucun déclaré.

**Remerciements** : Je remercie mes collègues Allan Hackett, Lynne Boddy, John Boothby, Brian Johnson et Gareth Stratton, de l'Université John Moores de Liverpool au Royaume-Uni, pour leur collaboration à la recherche dont sont tirées les cartes de la Figure 1 dans le cadre du plus vaste projet SportsLinX de Liverpool. Je remercie également Louise Parker pour ses commentaires sur l'une des versions préliminaires du manuscrit.

## RÉFÉRENCES

1. Tunstall HVZ, Shaw M, Dorling D. Places and health. *J Epidemiol Comm Health* 2004;58:6-10.
2. Meade M, Earickson R. *Medical geography*. New York: Guilford Press; 2000.
3. Mayer JD. Geography, ecology and emerging infectious diseases. *Soc Sci Med* 2000;50:937-52.
4. Jones K, Moon G. *Health, disease and society: an introduction to medical geography*. London: Routledge and Kegan Paul; 1987.
5. Dahlgren G, Whitehead M. *Policies and strategies to promote social equity in health*. Stockholm: Institute for Future Studies; 1991.
6. Asthana S, Curtis S, Duncan C et coll., Themes in British health geography at the end of the century: a review of published research 1998-2000. *Soc Sci Med* 2002; 55:167-73.
7. Burns CM, Inglis AD. Measuring food access in Melbourne: access to healthy and fast foods by car, bus and foot in an urban municipality in Melbourne. *Health Place* 2007;13:877-85.
8. Aytur SA, Rodriguez DA, Evenson KR et coll., The sociodemographics of land use planning: relationships to physical activity, accessibility, and equity. *Health Place*. DOI 10.1016/j.healthplace.2007.08.004. Cyberpublication, 22 août 2007, avant impression.
9. Boulos MN, Roudsari AV, Carson ER. Health geomatics: an enabling suite of technologies in health and healthcare. *J Biomed Inform* 2001;34:195-219.
10. Kulldorff M, Feuer EJ, Miller BA et coll., Breast cancer in north-eastern United States: a geographical analysis. *Am J Epidemiol* 1997;146:161-70.
11. Green C, Elliott L, Beaudoin C et coll., Population-based ecologic study of inflammatory bowel disease: searching for etiologic clues. *Am J Epidemiol* 2006;164:615-23.
12. Stafford M, Cummins S, Ellaway A et coll., Pathways to obesity: identifying local, modifiable determinants of physical activity and diet. *Soc Sci Med*. DOI 10.1016/j.socscimed.2007.05.042. Cyberpublication, 20 juillet 2007, avant publication.
13. Dummer TJB, Dickinson HO, Parker L. Adverse pregnancy outcomes around incinerators and crematoriums in Cumbria, north west England, 1956-93. *J Epidemiol Community Health* 2003;57:456-61.
14. Elliott P, Shaddick G, Wakefield JC et coll., Long term associations of outdoor air pollution with mortality in Great Britain. *Thorax* 2007;62:1088-94.
15. Haynes R, Bentham G, Lovett A et coll., Effects of distances to hospital and GP surgery on hospital inpatient episodes, controlling for needs and provision. *Soc Sci Med* 1999;49:425-33.
16. Quesnel-Barbet A, Nuttens MC, Aublet-Cuvellier B et coll., Modelling a regional reorganization of cardiovascular surgery provision. *Health Place* 2005;11:283-92.
17. Pampalon R, Martinez J, Hamel D. Does living in rural areas make a difference for health in Québec? *Health Place* 2006;12:421-35.
18. Shaw M, Dorling D, Gordon D et coll., Putting time, person and place together: the temporal, social and spatial accumulation of health inequality. *Crit Public Health* 2001;11:289-304.
19. Milligan C, Bingley A. Restorative places or scary spaces? The impact of woodland on the mental well-being of young adults. *Health Place* 2007;13:799-811.
20. Wakefield S, McMullan C. Healing in places of decline: (re)imagining everyday landscapes in Hamilton, Ontario. *Health Place* 2005;11:299-312.
21. Marmot M. Social determinants of health inequalities. *Lancet* 2005;365:1099-104.
22. Fotheringham AS, Brunson C, Charlton M. *Quantitative geography: perspectives on spatial data analysis*. London: Sage; 2000.
23. Pearce J. Incorporating geographies of health into public policy debates: The Geo-Health Laboratory. *NZ Geog* 2007;3:149-53.
24. Frank LD, Andresen MA, Schmid TL. Obesity relationships with community design, physical activity, and time spent in cars. *Am J Prev Med* 2004;27:87-96.
25. Pearce N. The ecological fallacy strikes back. *J Epidemiol Community Health* 2000;54:326-7.
26. Cummins S, Curtis S, Diez-Roux AV et coll., Understanding and representing 'place' in health research: a relational approach. *Soc Sci Med* 2007;65:1825-38.
27. Boothby J, Dummer TJB. Facilitating mobility? The role of GIS. *Geography* 2003;88:300-11.

**Correspondance** : Dr Trevor Dummer, IWK Health Centre, Goldbloom RCC Pavilion, 5850/5980 University Ave., PO Box 9700, Halifax NS B3K 6R8; trevor.dummer@iwk.nshealth.ca
